# Supplementary material for: Enhancing bromine-doped CuBiI4 photodetectors through charge dynamics and conductivity analysis
Source: Royal Society of Chemistry journal article supplement (doi:10.1039/d4tc01944j), 2024-01-01
Supplement: d4tc01944j1.pdf [file d4tc01944j1.pdf]

## Supporting Information

### Enhancing Bromine-Doped CuBiI<sub>4</sub> Photodetectors through Charge Dynamics and Conductivity Analysis

Zhenxing Duan,<sup>a#</sup> Yinying Shu,<sup>b#</sup> Yanjie Liu,<sup>b</sup> Jundie Hu,<sup>b</sup> Jiafu Qu,<sup>b</sup> Meiying Gong<sup>b</sup>, Zhichao Zhang<sup>b</sup>, Wei Sun,<sup>c</sup> Xiaogang Yang<sup>\*b</sup> and Chang Ming Li<sup>b</sup>

<sup>a</sup> School of Physical Science and Technology, Suzhou University of Science and Technology, 1 Kerui Road, Suzhou 215011, China.

<sup>b</sup> Institute of Materials Science and Devices, School of Material Science and Engineering, Suzhou University of Science and Technology, Suzhou, 215009, P.R. China.

<sup>c</sup> Key Laboratory of Laser Technology and Optoelectronic Functional Materials of Hainan Province, Key Laboratory of Functional Materials and Photoelectrochemistry of Haikou, College of Chemistry and Chemical Engineering, Hainan Normal University, Haikou 571158, P R China.

# Authors contribute equally.

Corresponding authors: [xiaogang.yang@gmail.com](mailto:xiaogang.yang@gmail.com), [yangxg@usts.edu.cn](mailto:yangxg@usts.edu.cn)

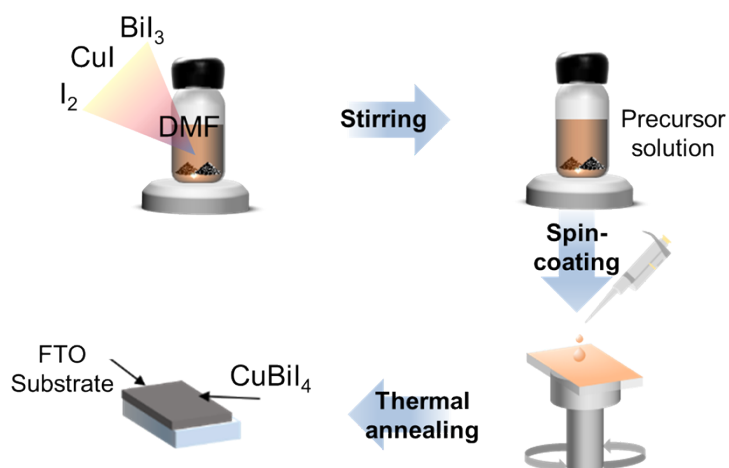

Figure S1. Spin-coating process to CuBi<sub>4</sub> films: CuI, BiI<sub>3</sub> and I<sub>2</sub> were dissolved in DMF solution under stirring for 2-4 hours, which resulted in a precursor solution for the spin-coating process. After the thermal annealing, the grey-black films were obtained.

For Br-doped CuBi<sub>4</sub> films, a portion of CuI was replaced by CuBr from the beginning, keeping all other conditions the same.

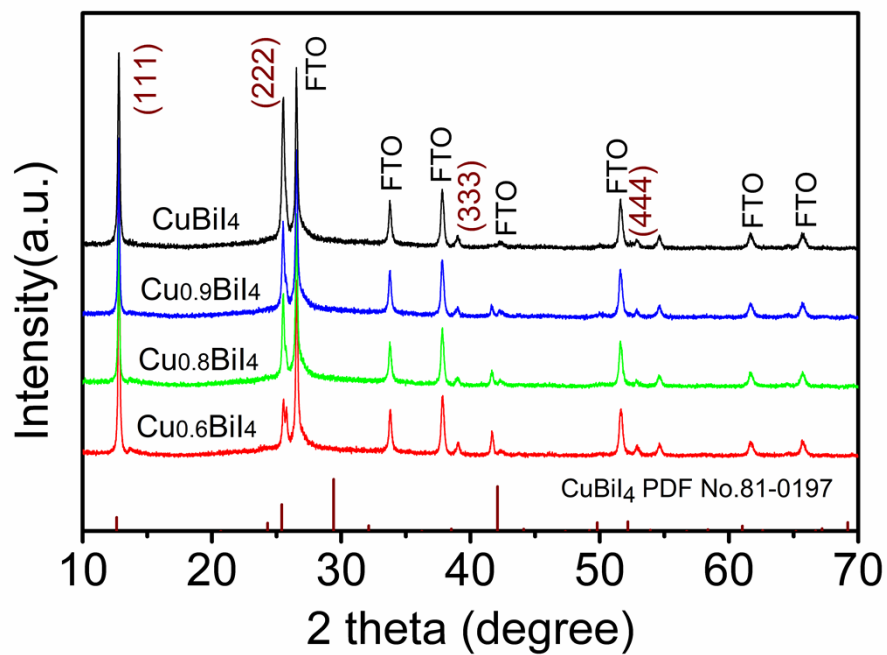

Figure S2. The XRD patterns of CuBi<sub>4</sub> with various Cu/Bi ratios of 1:1, 0.9:1, 0.8:1 and 0.6:1. Pure CuBi<sub>4</sub> crystalline films could be prepared, which had a cubic structure (JCPDS card. No. 81-0197).

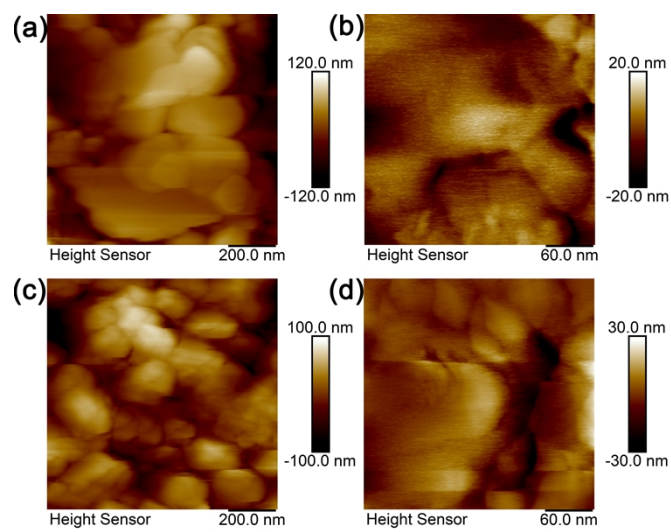

Figure S3. AFM images of the undoped (a & c) and Br0.2 (b & d) doped  $\text{CuBi}_4$  films.

Table S1. The optoelectronic parameters of the CuBiI<sub>4</sub> photodetector.

| CuBiI <sub>4</sub> | Responsivity<br>(A/W) | Response time<br>$\tau_{\text{rise}}$ (s) | Response time<br>$\tau_{\text{fall}}$ (s) | On/off ratio |
|--------------------|-----------------------|-------------------------------------------|-------------------------------------------|--------------|
| Undoped            | $8.52 \times 10^{-5}$ | 0.24                                      | 0.20                                      | 31.2         |
| Br0.1              | $2.01 \times 10^{-4}$ | 0.23                                      | 0.17                                      | 41.3         |
| Br0.2              | $3.41 \times 10^{-4}$ | 0.2                                       | 0.15                                      | 40.6         |
| Br0.3              | $1.70 \times 10^{-4}$ | 0.24                                      | 0.17                                      | 20.4         |
| Br0.4              | $1.39 \times 10^{-5}$ | 0.12                                      | 0.15                                      | 65           |

Note: measured under a bias of 3 V and white LED illumination (100 mW/cm<sup>2</sup>).

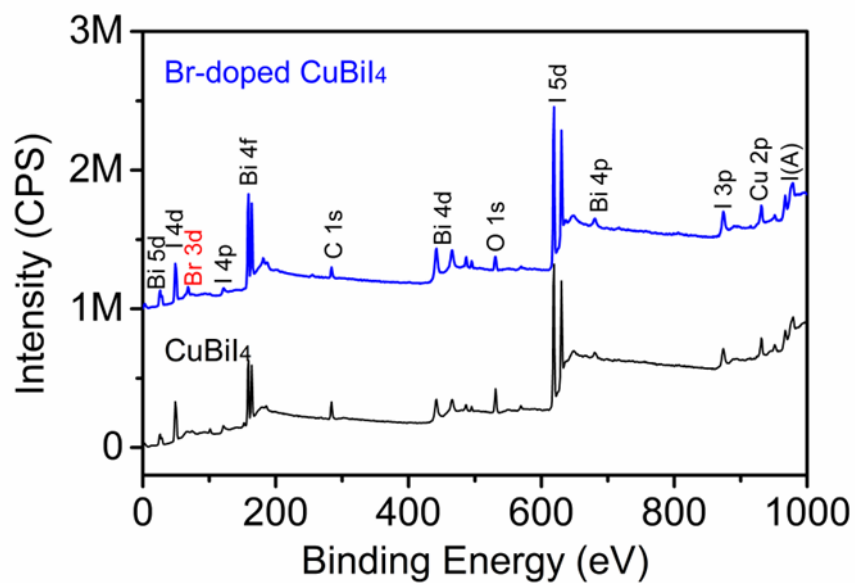

Figure S4. The X-ray photoelectron spectroscopy (XPS) survey spectra confirmed the presence of essential elements, including copper (Cu), bromine (Br), and iodine (I), in the sample. The doped CuBiI<sub>4</sub> films showed a conspicuous peak ~69 eV, which was ascribed to Br3d.

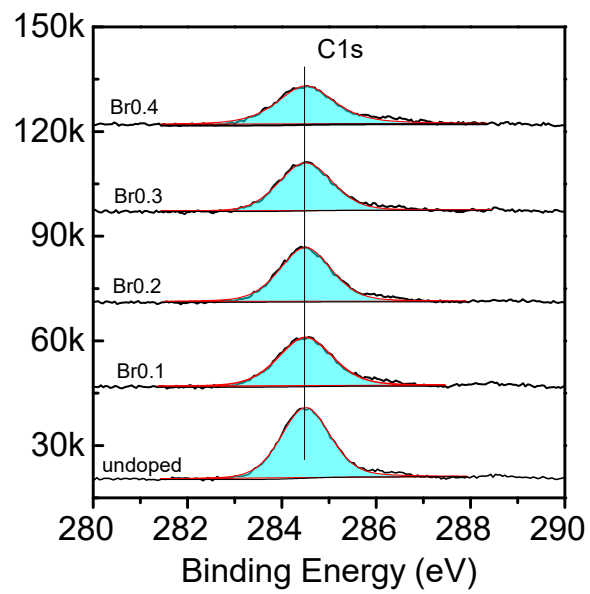

Figure S5. The XPS spectra of C1s on undoped, Br-doped CuBiI<sub>4</sub> films.

| CuBiI <sub>4</sub> Films | Br3d                 | Cu2p 3/2             | Bi4f 7/2             | I3d5/2               | Cu/Bi/I/Br Ratio        |
|--------------------------|----------------------|----------------------|----------------------|----------------------|-------------------------|
| S.F.                     | 0.59                 | 4.3                  | 2.8                  | 4.4                  | -                       |
| undoped                  | -                    | 3.00×10 <sup>4</sup> | 1.09×10 <sup>5</sup> | 2.84×10 <sup>5</sup> | 0/0.433/2.415/4.00      |
| Br0.1                    | 7.55×10 <sup>3</sup> | 2.96×10 <sup>4</sup> | 1.44×10 <sup>5</sup> | 3.42×10 <sup>5</sup> | 0.304/2.271/3.435/0.565 |
| Br0.2                    | 8.39×10 <sup>3</sup> | 2.75×10 <sup>4</sup> | 1.26×10 <sup>5</sup> | 2.83×10 <sup>5</sup> | 0.327/2.291/3.274/0.726 |
| Br0.3                    | 1.22×10 <sup>3</sup> | 1.95×10 <sup>4</sup> | 1.39×10 <sup>5</sup> | 2.77×10 <sup>5</sup> | 0.216/2.374/3.008/0.992 |
| Br0.4                    | 1.47×10 <sup>3</sup> | 3.05×10 <sup>4</sup> | 1.57×10 <sup>5</sup> | 3.06×10 <sup>5</sup> | 0.300/2.366/2.945/1.055 |

Table S2. The element ratio on the undoped and Br-doped CuBiI<sub>4</sub> surfaces.

S.F.: sensitive factor data is used from reference<sup>1</sup>.



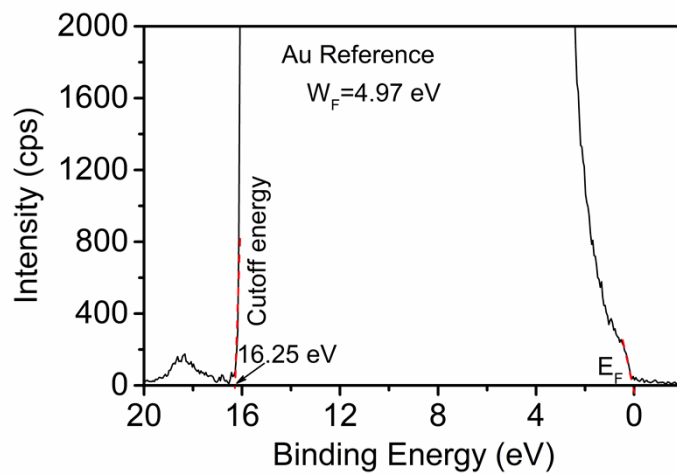

Figure S6. UPS of Au standard film. The work function of Au was 4.97 eV, which was slightly lower than the 5.31 eV on Au (111)<sup>2</sup>.

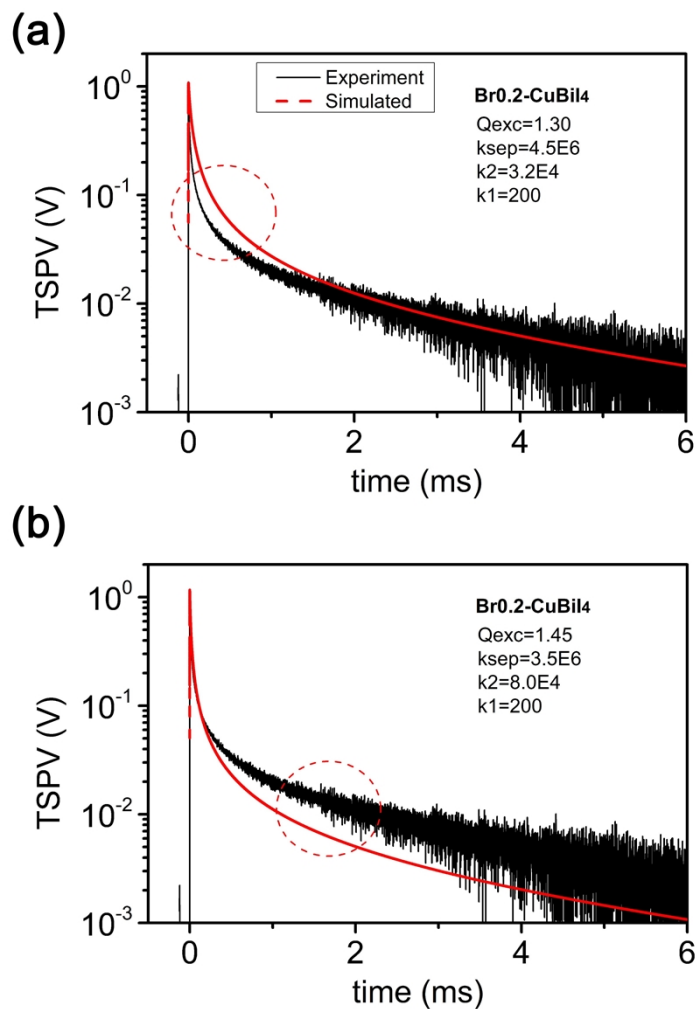

Figure S7. The simulation curves are based on 1<sup>st</sup>-order and 2<sup>nd</sup>-order recombination with different parameters: (a) smaller  $k_2$  rate constant ( $3.2 \times 10^4$ ) shows large discrepancy in the early stage due to the slower consumption of surface charge; (b) larger  $k_2$  rate constant ( $8.0 \times 10^4$ ) shows large discrepancy in the late stage due to the faster consumption of surface charge.

Table S3. The rate constants calculated based on the Eq. (6) in the paper and the TSPV

| CuBiI <sub>4</sub> Films | $k_{\text{sep}}$ (1 <sup>st</sup> ) | $K_3$ (3 <sup>rd</sup> ) | $k_1$ (1 <sup>st</sup> ) | $t_{\text{max}}$     | $Q_{\text{exc}}$ | cur<br>ves.<br>Not<br>e:<br>$\frac{dQ_{\text{sep}}}{dt} = k_{\text{sep}}Q_{\text{exc}} - k_n Q_{\text{sep}}^n - k_1 Q_{\text{sep}}$<br>(6)<br>The<br>$Q_{\text{ex}}$<br>c, |
|--------------------------|-------------------------------------|--------------------------|--------------------------|----------------------|------------------|----------------------------------------------------------------------------------------------------------------------------------------------------------------------------|
| undoped                  | $3.1 \times 10^6$                   | $2.9 \times 10^5$        | 460                      | $8.2 \times 10^{-7}$ | 1.36             |                                                                                                                                                                            |
| Br0.1                    | $3.1 \times 10^6$                   | $7.5 \times 10^5$        | 480                      | $6.4 \times 10^{-7}$ | 1.47             |                                                                                                                                                                            |
| Br0.2                    | $2.6 \times 10^6$                   | $6.5 \times 10^5$        | 500                      | $6.6 \times 10^{-7}$ | 1.8              |                                                                                                                                                                            |
| Br0.3                    | $3.6 \times 10^6$                   | $2. \times 10^5$         | 900                      | $7.5 \times 10^{-7}$ | 1.05             |                                                                                                                                                                            |
| Br0.4                    | $2.7 \times 10^6$                   | $3.2 \times 10^6$        | 700                      | $6.9 \times 10^{-7}$ | 0.70             |                                                                                                                                                                            |

$Q_{\text{sep}}$ ,  $k_{\text{sep}}$ ,  $k_n$  and  $k_1$  are the initial photogenerated charges in bulk shortly after the transient laser excitation, the surface charge transported from bulk through separation, the apparent rate constant of charge separation (1<sup>st</sup>-order), the rate constant of multiple-charge (n<sup>th</sup>-order) decay reaction and the rate constant of an apparent single charge (1<sup>st</sup>-order) decay reaction, respectively.

### References:

1. C. D. Wagner, C. D. Wagner and G. E. Muilenberg, *Handbook of X-ray Photoelectron Spectroscopy: A Reference Book of Standard Data for Use in X-ray Photoelectron Spectroscopy*, Perkin-Elmer, 1979.
2. W. M. Haynes, *CRC Handbook of Chemistry and Physics*, CRC Press, 2014.
